# Supplementary material
Source: PubMed Central journal article supplement (PMC3686899)
Supplement: NIHMS444394-supplement-01.pdf [file NIHMS444394-supplement-01.pdf]

## 1 **ONLINE SUPPLEMENTAL MATERIAL**

### 2 **Supplemental Methods**

#### 3 **Cell-free plasma Hb levels and spectral deconvolution of species**

4 The plasma samples showed significant non-Hb related background signal and a partial  
5 background correction was carried out as follows. To correct for light scattering, the absorbance  
6 values between 675 nm and 700 nm from each spectrum were used to calculate a straight line  
7 which was extrapolated to the whole spectral range and subtracted from the experimental  
8 spectrum. With the correction, significant background absorbance remained evident in the 450 -  
9 550 nm range and therefore, only the 550-700 nm range was used for least squares analysis.

10

#### 11 **NO consumption**

12 In brief, 0.01 mM DETANONOate, a NO donor with a half-life of 56 h at 25°C, was  
13 equilibrated in an anaerobic purge vessel flushed with helium running into a NO  
14 chemiluminescence analyzer (Sievers, Boulder CO). When the NO concentration achieved a  
15 steady state, samples of supernatant from the stored blood units were injected into the solution  
16 and the instantaneous decrease in NO concentration was quantified.

17

#### 18 **Supplemental Figure Legends**

19 **Supplemental Figure 1:** The format is similar to Figure 1 except now mean ( $\pm$  SE) changes in  
20 CI (panel A) and heart rate (panel B) are shown.

21 **Supplemental Figure 2:** The format is similar to Figure 4 except instead during infusion  
22 (oxyHb, Panel A, and metHb, Panel B), the data post-infusion are shown (1-3 h).

1 **Supplemental Figure 3:** The format is similar to Figure 6 except now instead of oxyHb formed  
2 *in vivo* by reducing infused metHb, the metHb formed *in vivo* by oxidizing infused oxyHb is  
3 plotted from 0-3 h (Panels A-E).

4 **Supplemental Figure 4:** The format is similar to Figure 1 except now mean ( $\pm$  SE) changes in  
5 complete blood counts (panels A-D), electrolytes (panels E-H) and arterial blood gases (panels I-  
6 K) are shown. There were no significant differences throughout comparing treatment groups in  
7 all the panels (all,  
8 p=ns).

Supplemental figure 1

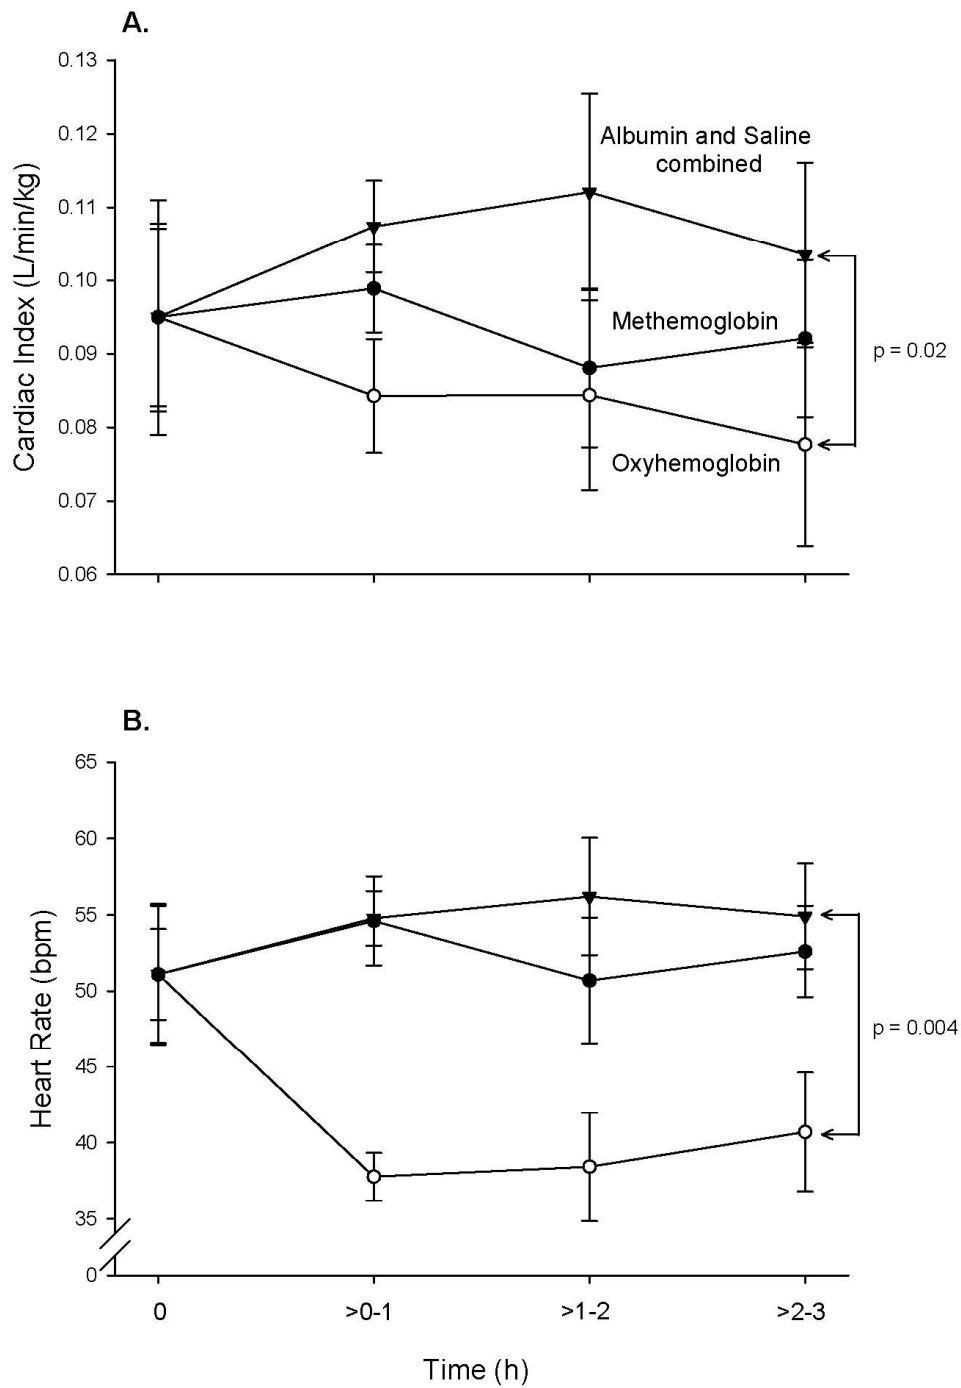

Supplemental Figure 2.

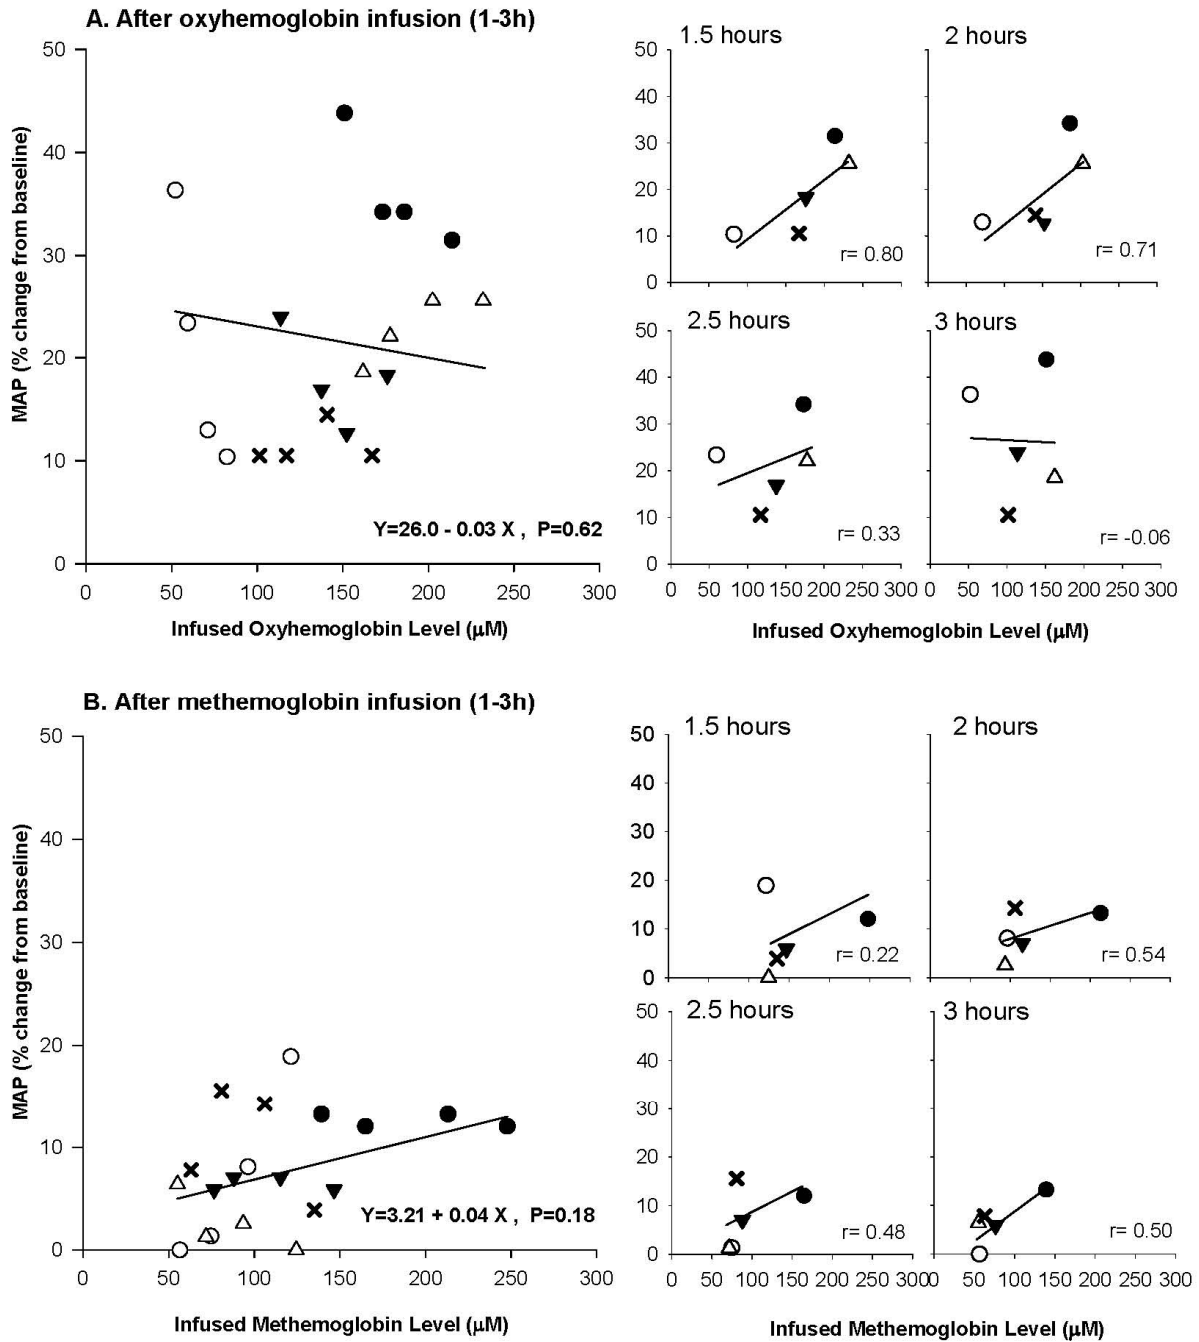

Supplemental Figure 3.

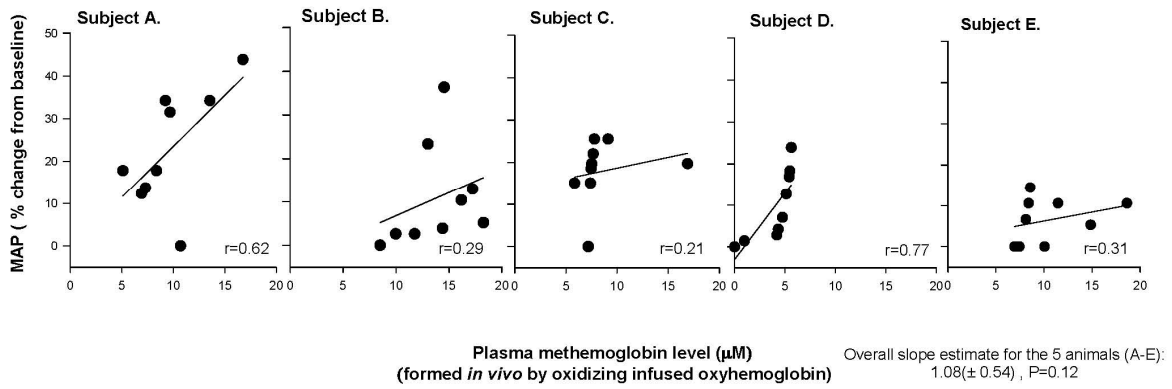

Supplemental figure 4

Complete Blood Count

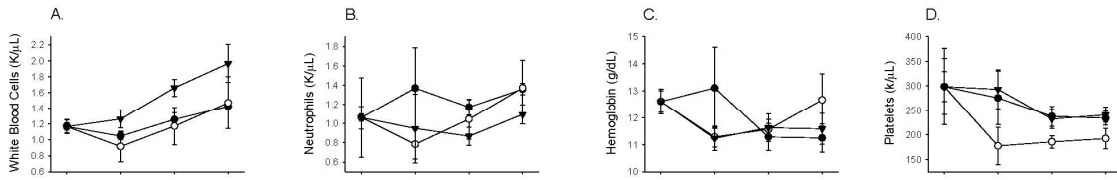

Electrolytes

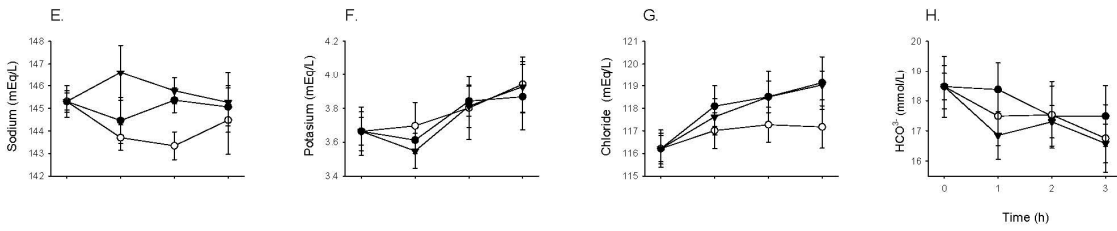

Arterial Blood Gases

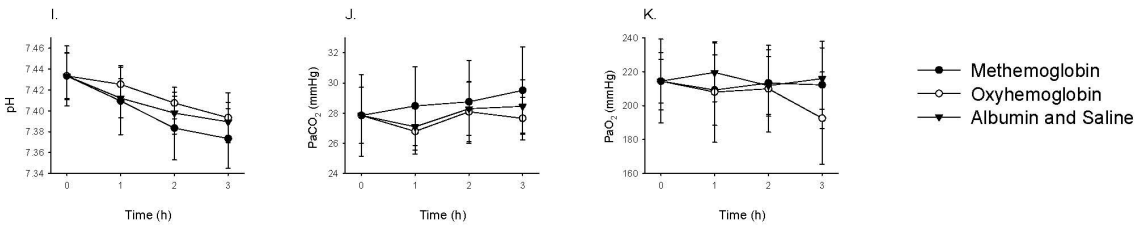

● Methemoglobin  
○ Oxyhemoglobin  
▼ Albumin and Saline
